# Supplementary material
Source: PubMed Central journal article supplement (PMC4141724)
Supplement: NIHMS620918-supplement-01.pdf [file NIHMS620918-supplement-01.pdf]

**Table 1. Characteristics of the apheresis and final anti-CD19-CAR products: one from a healthy subject and two from a patient with B-CLL**

|           | Apheresis Products    |                 |                 | Final Products        |                 |                 |
|-----------|-----------------------|-----------------|-----------------|-----------------------|-----------------|-----------------|
|           | Healthy Donor VR1 (%) | Patient VR2 (%) | Patient VR3 (%) | Healthy Donor VR1 (%) | Patient VR2 (%) | Patient VR3 (%) |
| CD3+      | 49.6                  | 11.4            | 12.9            | 95.0                  | 98.2            | 99.7            |
| CD3+ CD4+ | 32.1                  | NT              | 6.5             | 38.4                  | NT              | 66.1            |
| CD3+ CD8+ | 15.9                  | NT              | 5.5             | 43.8                  | 31.0            | 31.9            |
| CD19+     | 12.9                  | NT              | 80.7            | 0.3                   | NT              | 0.0             |
| CD56+     | 8.2                   | 0.9             | 1.1             | 0.1                   | NT              | 0.1             |

NT = not tested

**Supplemental Table 1. Number of cells (x10e6) during the Expansion Phase of manufacture**

|        | Healthy Donor VR1 | Patient VR2 | Patient VR3 |
|--------|-------------------|-------------|-------------|
| Day 2  | 15                | 35          | 35          |
| Day 4  | 13                | 45          | 39          |
| Day 7  | 41                | 60          | 92          |
| Day 9  | 56                | 126         | 138         |
| Day 11 | 95                | 190         | 273         |
| Day 14 | 146               | 290         | 484         |
